# Supplementary figures and images for: Water-stable lanthanide–organic macrocycles from a 1,2,4-triazole-based chelate for enantiomeric excess detection and pesticide sensing
Source: Royal Society of Chemistry journal article supplement (doi:10.1039/d1dt00726b), 2021-01-01

Previous chelates

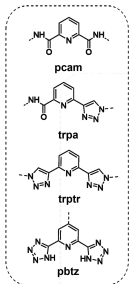

This work

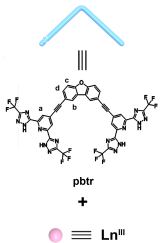

Base

mesocate/helicates

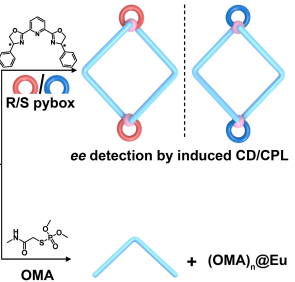

Pesticide sensing by disassembly

Supplement: d1dt00726b2.pdf [file d1dt00726b2.pdf]
